1     **The contribution of mutation to variation in temperature-dependent sprint speed in**  
2                                     **zebrafish, *Danio rerio***

3

4     Christina L. Miller<sup>1\*</sup>, Derek Sun<sup>1,2</sup>, Lauren H. Thornton<sup>1,3</sup>, and Katrina McGuigan<sup>1</sup>

5

6     <sup>1</sup>School of Biological Sciences, The University of Queensland, Brisbane 4072, Australia

7     <sup>2</sup> Current address: frc environmental, PO Box 2363, Wellington Point Qld 4160, Australia

8     <sup>3</sup> Current address: School of Science, Technology, and Engineering, University of the

9     Sunshine Coast, Sippy Downs, Qld 4556, Australia

10

11

12

## Abstract

13 The contribution of new mutations to phenotypic variation, and the consequences of this  
14 variation for individual fitness, are fundamental concepts for understanding genetic variation  
15 and adaptation. Here, we investigated how mutation influenced variation in a complex trait in  
16 zebrafish, *Danio rerio*. Typical of many ecologically relevant traits in ectotherms, swimming  
17 speed in fish is temperature-dependent, with evidence of adaptive evolution of thermal  
18 performance. We chemically induced novel germline point mutations in males, and measured  
19 sprint speed in their sons at six temperatures (between 16°C and 34°C). Mutational effects on  
20 speed were strongly positively correlated among temperatures, resulting in statistical support  
21 for only a single axis of mutational variation, reflecting temperature-independent variation in  
22 speed (faster-slower mode). While these results suggest pleiotropic effects on speed across  
23 different temperatures, when mutation have consistent directional effects on each trait,  
24 spurious correlations arise via linkage, or heterogeneity in mutation number. However,  
25 mutation did not change mean speed, indicating no directional bias in mutational effects. The  
26 results contribute to emerging evidence that mutations may predominantly have synergistic  
27 cross-environment effects, in contrast to conditionally neutral or antagonistic effects which  
28 underpin thermal adaptation. However, aspects of experimental design might limit resolution  
29 of mutations with non-synergistic effects.

30

31

## Introduction

32 Populations can rapidly evolve in response to environmental changes (Hendry and Kinnison  
33 1999; Hairston et al. 2005; Reznick et al. 2019), with strong evidence that local adaptation is  
34 common (Leimu and Fischer 2008; Hereford 2009). These observations point to the pervasive  
35 presence of heterogeneity among genotypes in their fitness under different environmental  
36 conditions, that is, variance due to genotype-by-environment interactions (GxE). In addition  
37 to supporting adaptive divergence of trait mean, GxE also represents the evolutionary  
38 potential of phenotypic plasticity, the expression of environment-specific phenotypes by the  
39 same genotype (Via and Lande 1985; de Jong 1990). GxE has been reported for diverse  
40 quantitative traits and environments in populations of a wide range of organisms (Des Marais  
41 et al. 2013; Wood and Brodie 2015; Saltz et al. 2018). Furthermore, environment-specific  
42 effects of segregating alleles have been characterised for specific loci (e.g., Barrett et al.  
43 2009; Li et al. 2014). However, the interaction of evolutionary processes to generate and  
44 maintain quantitative genetic variation, including GxE, are not well understood (de Jong and  
45 Gavrillets 2000; Josephs 2018; Walsh and Lynch 2018).

46

47 Mutation is the ultimate source of genetic variation. Heterogeneous selection pressures may  
48 alter allele frequencies and shape the standing genetic variation available for on-going  
49 adaptive evolution, but the distribution of phenotypic effects of mutations that arise could  
50 ultimately determine the nature of standing genetic variation (de Jong and Gavrillets 2000;  
51 Walsh and Lynch 2018), whether populations persist (Lynch and Gabriel 1990; Gabriel et al.  
52 1993), and how they adapt (Lorch et al. 2003; Mee and Yeaman 2019). Broadly, there are  
53 two ways that mutation can impact these processes.

54

55 First, if mutations have a consistent direction of effect on fitness across environments,  
56 heterogeneity in the magnitude of effect (strength of selection) may result in the magnitude of  
57 standing genetic variation differing among environments. In particular, for deleterious  
58 mutations, variation in the magnitude of fitness effect could result in accumulation of greater  
59 mutation load under some environments, and rapid purging under environment change  
60 (potentially leading to rapid population size declines). Martin and Lenormand (2006) and  
61 Agrawal and Whitlock (2010) reviewed studies in which mutational effects under standard  
62 rearing conditions were contrasted with effects under stressful levels of chemical toxins,  
63 nutritional resources, or temperature. No overall pattern was detected, with mutations having  
64 the same effect in both environments, or either stronger or weaker fitness effects. An updated  
65 analysis by Berger et al. (2021) arrived at the same conclusion for abiotic stressors generally,  
66 but their results suggested elevated temperatures typically increased the strength of selection.

67

68 A second way that mutational effects may impact evolutionary genetic phenomena is through  
69 their contribution to GxE associated with local adaptation. In their meta-analysis of nine  
70 studies of mutational effects, Martin and Lenormand (2006) identified a consistent pattern of  
71 increased variance in mutational effects in stressful relative to benign conditions, concluding  
72 that the frequency of beneficial mutations increased as the environmental change shifted the  
73 population further from the ancestral adaptive optimum. A shift in the distribution of fitness  
74 effects of mutations has long been hypothesised (Fisher 1930; Orr 1998), with accumulating  
75 empirical evidence of an increase in the frequency of beneficial mutations as the ancestor  
76 becomes less fit (e.g., Silander et al. 2007; Stearns and Fenster 2016). A shift in fitness  
77 effects among environments suggests mutations may typically have antagonistic pleiotropic  
78 effects (i.e., trade-off) across environments, being beneficial under some conditions, but  
79 deleterious under others, consistent with theories of local adaptation (Felsenstein 1976;

80 Bürger 2000). In contrast, observation of predominantly positive cross-environment  
81 mutational correlations (Fry and Heinsohn 2002; Baer et al. 2006; Latimer et al. 2014) as  
82 well as direct characterisation of individual mutations under different environmental  
83 conditions (Ostrowski et al. 2005; Sane et al. 2018; Stewart et al. 2022), suggest that  
84 mutations more frequently have conditionally neutral (i.e., affecting the trait in only one  
85 environment) or concordant (synergistic) cross-environment effects.

86

87 Notably, much of the research into environmental dependency of mutational effects has  
88 focused on contrasting fitness effects between different types of environments (e.g.,  
89 alternative nutrition sources) or between dichotomous, typically extreme, levels of an  
90 environmental variable. Levels of many abiotic and biotic factors vary on a continuous scale,  
91 with populations inhabiting complex, multidimensional environments. The environmental  
92 experience of any given mutation (arising spontaneously in a generation) will therefore be  
93 sampled from the distribution of natural conditions a population experiences over both its  
94 spatial range and an individual's lifecycle. Mutations may come under fluctuating direction  
95 or strength of selection due to environment heterogeneity on these scales, which will  
96 influence the nature of standing genetic variation within populations. Studies under natural,  
97 field, conditions have revealed heterogeneity in mutational effects between temporally or  
98 spatially varying conditions (Roles et al. 2016; Rutter et al. 2018). We suggest that  
99 understanding how mutation contributes to standing genetic variation, and evolutionary  
100 potential, depends on extending our understanding of the heterogeneity of mutational effects  
101 across environmental gradients spanning ecologically relevant values.

102

103 Temperature is a key aspect of the environment, which changes over short (diurnal), medium  
104 (seasonal) and long (e.g., climate warming) time scales, as well as over small (e.g., shade vs

105 sun patches; lake shallows vs depths) and large (latitudinal or elevational) spatial scales.  
106 Temperature affects biochemical reactions, which, in organisms with variable body  
107 temperatures (ectotherms), will affect physiological rates and all traits dependent on those  
108 rates, ultimately encompassing fitness (Huey and Kingsolver 1989; Hochachka and Somero  
109 2002; Angilletta 2009). Temperature-dependent traits in ectotherms typically follow a  
110 stereotypical pattern of increasing values up to a so-called optimal temperature, followed by a  
111 rapid decline in values (Huey and Kingsolver 1989; Izem and Kingsolver 2005). Ecologically  
112 relevant modes of variation in this thermal performance curve shape have been identified,  
113 particularly variation in optimal temperature (hotter-colder mode) and in the width of the  
114 function (i.e., the range of temperatures over which high levels of performance are  
115 maintained: the specialist-generalist mode) (Huey and Kingsolver 1989; Izem and Kingsolver  
116 2005). There are many examples of divergence among populations and species aligned with  
117 these modes of variation, typically reflecting known differences in thermal ecology of the  
118 taxa (e.g., Yamahira et al. 2007; Logan et al. 2018). Both hotter-colder and specialist-  
119 generalist modes of variation are consistent with antagonistic or conditionally neutral, rather  
120 than concordant cross-environment effects of contributing genetic variants (Kingsolver et al.  
121 2001; Izem and Kingsolver 2005).

122

123 While several studies have investigated mutational effects on traits that will impact  
124 physiological processes (e.g., metabolites and enzymes: Clark et al. 1995; Harada 1995;  
125 Davies et al. 2016), few have considered whole-organism performance traits other than  
126 fitness itself (Huey et al. 2003; Ajie et al. 2005; Latimer et al. 2014). Locomotor performance  
127 is a thermally sensitive trait in ectotherms (e.g., Condon et al. 2010; Latimer et al. 2014;  
128 Logan et al. 2018), and contributes to fitness-enhancing functions such as feeding, migration,  
129 mating and predator evasion (Jayne and Bennett 1990; Irschick and Garland 2001; Husak and

130 Fox 2008; Irschick et al. 2008; Careau and Garland 2012). While few studies have supported  
131 selection acting directly on performance indices such as maximum speed or endurance  
132 (Walker et al. 2005; Irschick et al. 2008; Wilson et al. 2020), repeated (parallel or  
133 convergent) evolution of the same performance – environment relationships (e.g., McGuigan  
134 et al. 2003; Nelson et al. 2008; Fu et al. 2013; da Silva et al. 2014; Kern and Langerhans  
135 2019) is consistent with performance being genetically correlated with fitness. Similarly,  
136 thermal performance curves for locomotor phenotypes have diverged among taxa inhabiting  
137 different thermal environments (e.g., Logan et al. 2018) consistent with thermal heterogeneity  
138 in locomotor performance being an ecologically relevant and heritable phenotype.

139

140 Here, we applied a chemical mutagen to induce mutations in males of a laboratory strain of  
141 zebrafish (*Danio rerio*) and investigated the effects of these mutations on swimming  
142 performance of their sons. We assayed sprint swimming speed at the constant temperature  
143 experienced by these fish throughout their life (28°C; where the zebrafish stock centre system  
144 temperature is 28.5°C: Westerfield 2007) and during acute exposure to five other  
145 temperatures between 16°C and 34°C. Zebrafish are distributed throughout India and  
146 neighbouring countries, from sea level to over 1500m, and are typically found in habitats  
147 with temperatures between 16.5°C and 34.0°C, although more extreme temperatures have  
148 been reported (12.3°C - 38.4°C) (McClure et al. 2006; Spence et al. 2006; Engeszer et al.  
149 2007; Arunachalam et al. 2013). Applying multivariate analyses and contrasting among-  
150 family variance estimated from sons of mutated sires to that estimated from sons of control,  
151 non-mutated males, we investigated the contribution of new mutation to the variation in this  
152 complex, environmentally dependent phenotype. We particularly focus on determining  
153 whether mutations have concordant effects on speed across all temperatures, or whether

154 mutations have conditionally neutral or antagonistic effects, generating heterogeneity in  
155 mutational variance among temperatures.

156

## 157 **Methods**

158 All work was conducted with approval of The University of Queensland's Animal Welfare  
159 Unit. Adults of the Wild India Kolkata (WIK: Rauch et al. 1997) strain were imported from  
160 the Zebrafish International Resource Centre (Oregon), founding a local population at The  
161 University of Queensland, maintained for five generations prior to the current experiment  
162 (~30 parents per sex per generation). Following protocols detailed in Rohner et al. (2011) and  
163 McGuigan and Aw (2017), males were mutagenized via a 40-minute exposure to 3mM of N-  
164 ethyl-N-nitrosourea (ENU). ENU is an alkylating agent that induces point mutations  
165 spanning a full spectrum of effects including nonsense, missense, and splice-site mutations  
166 (Knapik 2000; Wienholds et al. 2003). The ENU protocols developed for forward genetic  
167 screens to determine gene function, 1 hour exposure to 3mM ENU once a week for six  
168 weeks, induces ~1400 – 9400 mutations (de Bruijn et al. 2009; Rohner et al. 2011). Repeated  
169 exposure to ENU saturates DNA repair mechanisms (Noveroske et al. 2000), resulting in  
170 more mutations than a single, higher concentration, dose (Hitotsumachi et al. 1985; Rohner et  
171 al. 2011). Our aim, with ~1/9<sup>th</sup> of the total standard dose, was to induce relatively few  
172 mutations, more reflective of typical long-running spontaneous mutation accumulation (MA)  
173 studies in invertebrates and plants (Halligan and Keightley 2009; Katju and Bergthorsson  
174 2019). We consider the potential consequences of the mutation protocol further in the  
175 Discussion.

176



177 At least two weeks after ENU exposure (ensuring germline mutation transmission: Mullins et  
178 al. 1994), each mutagenized male was paired with a non-mutagenized female from the same  
179 WIK population to generate full sibling families, referred to as the Mutant treatment. The  
180 WIK stock was originally founded by a single pair of fish (Rauch et al. 1997). Reflective of  
181 this small founder size, and ongoing maintenance at a small population size (Trevarrow and  
182 Robison 2004), WIK has low polymorphism relative to wild populations (Coe et al. 2009;  
183 Suurvali et al. 2020), and long runs of homozygosity, consistent with low effective  
184 population size (Suurvali et al. 2020). Nonetheless, WIK is far from genetically  
185 homogeneous (Coe et al. 2009; Brown et al. 2012; Butler et al. 2015; Suurvali et al. 2020),  
186 and thus to infer the effect of new mutations induced by ENU against this background of  
187 standing genetic variation, a second set of males from the same WIK population, but not  
188 exposed to ENU, were also bred with non-mutagenized females, again generating full-sibling  
189 families. These Control treatment families, reared and assayed under identical conditions to  
190 the Mutant families, allowed us to estimate both the increase in heritable phenotypic variance  
191 due to new mutations, and changes in trait mean, reflecting bias in the average direction of  
192 effect of mutations.

193

194 Due to logistical constraints on rearing larvae, breeding was conducted in two blocks (3.5  
195 weeks apart), with 27 and 23 families per treatment bred in the first and second block,  
196 respectively. Rates of natural spawning declined over time; to obtain the desired number of  
197 families (50 per treatment) and minimise age differences among families, we utilised in-vitro  
198 fertilisation (IVF) protocols on freshly collected gametes (Ransom and Zon 1999) to generate  
199 10 mutant and four control full-sib families.

200

201 Offspring from each of the 100 families (50 per Mutant and Control treatments) were reared  
202 in two replicate 3.5L tanks, with ~30 fish per tank at 28°C, following husbandry protocols  
203 detailed in (Conradsen et al. 2016). The 200 tanks were connected via a recirculating water  
204 system, with tank position randomised among families and mutagenesis treatment. At ~70-  
205 100 days post fertilisation (dpf), three males from each tank (six from each family; 600 in  
206 total) were injected with a coloured elastomer tag (Northwest Marine Technology, Inc, Shaw  
207 Island, WA, USA) on either their left or right dorsal side to allow for individual identification  
208 (protocol detailed in Conradsen and McGuigan 2015). Tagged males were then transferred to  
209 new 3.5L tanks, each of which contained six Mutant and six Control males, randomly  
210 sampled from the 50 families per treatment.

#### 211 *Swimming performance*

212 Swimming speed was assayed for each of the 600 tagged males at each of six temperatures:  
213 16°C, 20°C, 24°C, 28°C, 31°C, and 34°C. All males were first assayed at temperatures 16°C  
214 and 28°C in a semi-random order that ensured no bias in the order in which sons of the 100  
215 families encountered the test temperatures, the time of day (morning or afternoon) they  
216 swam, or the test apparatus (two swimming flumes were used). Fish were assayed at the  
217 remaining four temperatures following the same semi-randomised design. Offspring from the  
218 first block of breeding (27 families per treatment) completed all swim trials prior to the first  
219 trials for fish from the second breeding block. In Block 1 (2), fish were 90 - 119 (114 - 149)  
220 dpf at their first trial, and 152 - 212 (183 - 219) dpf at their last trial.

221

222 Swimming speed was assayed in either a 10L (swim chamber 38cm x 10cm x 9cm length x  
223 width x height) or 30L (46cm x 14cm x 13cm) flume (Loligo Systems, Tjele, Denmark).  
224 Water in the flumes was maintained at temperatures 28°C and above using heaters (200 W or

225 1500 W, Quian Hu, Singapore) and at temperatures 24°C and below using chillers (440 W  
226 TECO, Ravenna Italy). Fish were fasted for 12 – 24h prior to swimming. Prior to trials at non-  
227 ambient temperatures (above or below 28°C), all 12 fish from a single holding tank were  
228 placed individually in small tanks submersed in a larger tank at 28°C, which was then heated  
229 or cooled at a rate of 0.2°C per minute to bring the fish to their test temperature.  
230  
231 Speed was measured using a short-duration (<500 second) stepped velocity test (Brett 1964),  
232 a metric referred to as  $U_{\text{sprint}}$  (Starrs et al. 2011; Widrick et al. 2018).  $U_{\text{sprint}}$  has been shown to  
233 be strongly positively correlated with speed measured in more commonly used prolonged  
234 (>30 minute) stepped velocity tests (Reidy et al. 2000; Starrs et al. 2011), suggesting that  
235 these metrics capture similar information about individual swimming capability. The shorter-  
236 duration  $U_{\text{sprint}}$  was preferred in the current study due to the large number (3,600) of planned  
237 assays. To measure  $U_{\text{sprint}}$ , fish were placed into the swimming chamber at a flow rate of  
238  $16\text{cm s}^{-1}$  for two minutes. A pilot study confirmed this time was adequate for fish to exhibit  
239 routine behaviours. Flow was then increased by  $4\text{cm}^{-1}$  at intervals of 15 seconds. The trial  
240 was complete (and water flow stopped) when the fish was unable to hold station and was  
241 swept to the grid at back of the chamber.  $U_{\text{sprint}}$  was calculated following Brett (1964) as:  
242  $U_{\text{sprint}} = U_i + (U \times (T_{ii} / T))$ , where  $U_i$  was the maximum velocity ( $\text{cm}^{-1}$  second) maintained for  
243 the full 15 second interval,  $U$  was the water speed increment (here,  $4\text{cm}^{-1}$  second),  $T_{ii}$  was the  
244 time (seconds) the fish swam in their final velocity before tiring, and  $T$  was the time interval  
245 at each step (here, 15 seconds).

## 246 *Data Analyses*

247 Two approaches have been widely used to study variation in traits that change value as a  
248 function of the environment: functional or multivariate (character-state) (Kirkpatrick and

249 Heckman 1989; Griswold et al. 2008; Gomulkiewicz et al. 2018). Data from the current  
250 experiment, where all individuals were assayed at the same set of temperatures, is well suited  
251 to a multivariate approach (Gomulkiewicz et al. 2018). Implementing a multivariate  
252 analytical approach also directly supported comparison to results from the only other study,  
253 that we are aware of, investigating how mutational effects on locomotion vary with  
254 temperature (Latimer et al. 2014), and allowed us to explicitly address questions about  
255 heterogeneity in the magnitude of genetic (mutational) variance among temperatures, as well  
256 as the correlation in mutational effects across temperatures.

257

258 Swimming speed ( $U_{\text{sprint}}$ ) was assayed for a total of 594 males, with data at all six  
259 temperatures available for 576 of these. Estimates of quantitative genetic parameters are  
260 sensitive to extreme (outlier) values. Here, 27 observations of  $U_{\text{sprint}}$  were greater than 3.0  
261 standard deviations (SD) from the mean and excluded from all analyses. If these observations  
262 reflected large effect mutation, their exclusion would under-estimate mutational effects.  
263 However, outlier individuals were widely distributed across 22 families, 12 Control and 10  
264 Mutant, suggesting that they do not reflect mutational effects.

265

266 We first investigated whether induced mutations affected either the mean speed, or the  
267 average relationship between temperature and speed. We fit the following model using  
268 maximum likelihood within PROC Mixed in SAS (SAS Institute Inc. 2012):

269

$$270 \quad y = \mu + \mathbf{XB} + \mathbf{Z}_F \boldsymbol{\delta}_F + \mathbf{Z}_R \boldsymbol{\delta}_R + \mathbf{Z}_I \boldsymbol{\delta}_I \quad \text{Model (1)}$$

271

272 where  $y$  was the vector of  $U_{\text{sprint}}$  observations,  $\mu$  was the global mean  $U_{\text{sprint}}$  and  $\mathbf{X}$  was the  
273 design matrix relating observations to their level of the categorical fixed effects,  $\mathbf{B}$ . The fixed

274 effects of interest were mutation treatment (Mutant or Control), temperature, and the  
275 interaction between mutation treatment and temperature. Several other fixed effects were fit  
276 to account for additional potential sources of variation in speed. Trial, the six repeated  
277 measures of speed per individual, captured variation due to age, experience, and any changes  
278 in general laboratory conditions over the duration of the experiment. Time, categorised as  
279 AM or PM, was fit to account for potential diurnal effects on speed. Flume and block were fit  
280 to, respectively, account for differences in swimming performance between the two different  
281 flumes (10L versus 30L), or breeding blocks (containing fish from 27 and 23 families per  
282 treatment, respectively).  $\mathbf{Z}_F$ ,  $\mathbf{Z}_R$  and  $\mathbf{Z}_I$  were the design matrices for the variance in speed  
283 attributable to the random effects of Family, replicate Rearing tank (nested within Family),  
284 and Individual (nested within tank), respectively. Reflecting the repeated measures nature of  
285 the experimental design, these random effects were each modelled as unconstrained  
286 (co)variances in speed around temperature-specific intercepts ( $\delta_F$ ,  $\delta_R$  and  $\delta_I$ ). To assess the  
287 null hypotheses of no effect of mutation treatment on mean speed or temperature-specific  
288 speed, the Satterthwaite degrees of freedom correction was applied. Among-family variance  
289 was heterogenous between mutation treatments (see Results), and we investigated other  
290 models to ensure results were robust. We modified model (1) to fit treatment-specific random  
291 effects; to accommodate zero estimates of the hypothesis  $F$ -ratio denominator (due to no  
292 among-family variance in Control treatment), we applied a log-likelihood ratio test to the  
293 nested models in which the fixed effect of interest was fit versus not fit. The interaction  
294 between mutation treatment and temperature was tested first, and this no-interaction model  
295 was the reference model against which the main effects of mutation treatment and  
296 temperature were assessed. Both approaches supported the same conclusion and we therefore,  
297 report only the results from model (1).

298 Second, we investigated how mutagenesis affected the among-family (co)variance in  
299 swimming speed across the six temperatures. Mutagenesis of sires can contribute to  
300 differences between the Mutant and Control populations in both the among-family (where  
301 brothers inherit the same mutation from their father) and within-family (where brothers  
302 inherit different mutations) variance. However, variation between the two replicate rearing  
303 tanks per family, and among the three brothers sampled from each tank will reflect not only  
304 these genetic differences, but also the micro-environmental variation between and within  
305 tanks, respectively, which cannot be further partitioned out given our design. Therefore, we  
306 focus our investigation on among-family variation, which can be unambiguously assigned to  
307 genetic causes.

308 To estimate among-family variance, data was first centred (mean = 0) on the respective level  
309 of each of the fixed effects included in model (1). This approach is equivalent to fitting fixed  
310 effects in the analysis but improves model efficiency. Using REML in PROC MIXED to fit a  
311 modified version of model (1) (no fixed effects) to the data for each mutation treatment  
312 separately, we applied a factor analytic modelling approach (Hine and Blows 2006) to  
313 determine the statistically supported axes of the among-family covariance matrix. The  
314 among-family variation in swimming speed was constrained to zero (no among-family  
315 variance, implemented by not fitting the among-family effect) through to six dimensions  
316 (implemented using TYPE=FA0( $n$ ), where  $n$  was the number of dimensions, ranging from 1  
317 to 6). A log-likelihood ratio test (LRT) was applied to test whether adding a dimension  
318 improved model fit; the difference in log-likelihood between nested models follows a chi-  
319 square distribution with the degrees of freedom equal to the difference in the number of  
320 estimated parameters.

321

322 We then analysed data from both treatments within the same model, estimating treatment-  
323 specific random effects (implemented using the GROUP statement), to test the null  
324 hypothesis that mutagenesis affected genetic variation. We used a LRT to compare a model  
325 in which treatment-specific among-family variance was estimated to a model in which a  
326 common, pooled, among-family variance was estimated; given evidence of low-  
327 dimensionality (see Results), this model was fit with one dimension of among-family  
328 variance, but results were consistent for higher-dimension models.

329

330 To further investigate the nature of the among-family variance in speed, we estimated the  
331 unconstrained (TYPE=UN) treatment-specific among-family covariances. We placed robust  
332 confidence intervals on model estimates using the REML-MVN sampling approach (Meyer  
333 and Houle 2013; Houle and Meyer 2015). We used the MASS package (Venables and Ripley  
334 2002) in R (R Core Team 2020) to draw 10,000 random samples from the distribution  $N \sim (\hat{\theta},$   
335  $\mathbf{V})$  where  $\hat{\theta}$  was the vector of covariance parameter estimates, and  $\mathbf{V}$  was the asymptotic  
336 variance-covariance matrix from the REML model. While the REML variance estimates  
337 were constrained to be positive, the REML-MVN samples were not (i.e., were on the G-  
338 scale: Houle and Meyer 2015). We therefore interpreted the statistical significance of  
339 individual parameter estimates based on whether the confidence intervals (CI) included zero,  
340 which is equivalent to applying a LRT (Dugand et al. 2021). For variances, this is a one-  
341 tailed test (as variances cannot be negative; 90% CI), while for covariances it is a two-tailed  
342 test (95% CI). We used the ‘eigen’ function in base R (R Core Team 2020) to decompose the  
343 unconstrained REML estimates of among-family covariance to their major axes, and  
344 projected these axes ( $V_{F_T} = e^t V_{F_T} e$ , where  $V_{F_T}$  is the among-family variance in treatment T,  $e$   
345 is an eigenvector of the REML among-family matrix, and  $^t$  indicates the transpose)

346 (McGuigan and Aguirre 2016) through the 10,000 REML-MVN samples to place CI on the  
347 eigenvalues.

## 348 Results

349 Mutation did not change mean sprint speed (main effect of mutation treatment:  $F_{1, 99.8} = 0.31$ ,  
350  $p = 0.5767$ ), or the response of sprint speed to temperature (mutation treatment x temperature  
351 interaction:  $F_{5, 99.3} = 0.48$ ,  $p = 0.7909$ ) (Figure 1A).  $U_{\text{sprint}}$  depended on temperature (main  
352 effect of temperature:  $F_{5, 115} = 1861.76$ ,  $p < 0.0001$ ), exhibiting the classical pattern of  
353 thermal performance curves, with a rapid increase in speed until  $\sim 28^{\circ}\text{C}$  (maintenance  
354 temperature), although there was little decline in speed by the maximum assayed temperature  
355 ( $34^{\circ}\text{C}$ ) (Figure 1).

356

357 In the Control treatment, the estimated among-family (genetic) variation in swimming speed  
358 was zero at four of the six assayed temperatures, ranging up to a maximum of 3.08 (Table  
359 1A). Consistent with expectations, among-family variance was greater in the Mutant  
360 treatment at every temperature, ranging from 2.55 up to 11.70, although only at  $24^{\circ}\text{C}$  was the  
361 among-family variance statistically distinguishable from zero (Table 1B). We rejected the  
362 null hypothesis that Mutant and Control treatments had the same among-family variance  
363 (Log-likelihood ratio test of fit of models estimating one-dimension of treatment-specific  
364 versus pooled among-family variance:  $\chi^2 = 13.63$ ,  $df = 6$ ,  $P = 0.0341$ ). Thus, the data  
365 supported the hypothesis that the ENU mutagenesis introduced new genetic variation in  
366 swimming speed.

367

368 We compared the magnitude of among-family variance following mutagenesis (Mutant  
369 minus Control) to published estimates from spontaneous mutation accumulation studies on



370 traits classified by Conradsen et al. (2022) as physiological; these traits have an average  
371 magnitude of variance intermediate between fitness (life-history) and morphological traits  
372 (Figure 4b of Conradsen et al. 2022). We expanded the dataset to include estimates of  
373 *Drosophila serrata* locomotor activity at all temperatures assessed by Latimer et al. (2011).  
374 Mutational variance in  $U_{sprint}$  in the current study was within the range observed for these  
375 published estimates but was biased toward higher values (Figure 2).

376

377 The factor-analytic test of dimensionality best supported zero dimensions of among-family  
378 variance in the Control treatment (Table 2A). However, the REML-MVN CI of the  
379 eigenvalues supported two non-zero eigenvalues (Table 2A). Sztepanacz and Blows (2017)  
380 demonstrated REML-MVN CI are less robust to sampling error than factor analytic  
381 modelling and can lend statistical support to spurious covariance. While non-zero among-  
382 family variance in speed was estimated at two temperatures (24°C and 31°C: Table 1A), the  
383 model was unable to estimate (positive) variance at the other four temperatures and, further,  
384 the 90% CI of the among-family variance at both 24°C and 31°C spanned a wide range of  
385 negative through positive values (Table 1A) suggesting no statistical support for among-  
386 family variance in speed at any temperature. Reflecting this, the among-Control-family  
387 matrix was very ill-conditioned: the first eigenvalue (9.9; Table 2A) was substantially larger  
388 than the trace of the matrix (sum of the diagonal in Table 1A = 4.3), and there was a negative  
389 eigenvalue of nearly the same magnitude as the first (positive) eigenvalue (-9.3; Table 2).  
390 Therefore, we conclude that the weight of evidence is consistent with no statistical support  
391 for genetic variation in swimming speed ( $U_{sprint}$ ) in this WIK population.

392

393 In the Mutant treatment, there was statistical support for one-dimension of among-family  
394 variance (Table 2B), suggesting either that mutation had introduced variance in  $U_{sprint}$  at only

395 one assayed temperature (consistent with GxE), or that the effects of mutations were  
396 concordant across all assayed temperatures (consistent with no GxE). Although among-  
397 family variance was only statistically distinct from zero at 24°C, 90% CI estimates at three  
398 other temperatures were strongly skewed toward positive values, while the 90% CI of  
399 variance estimates substantially overlapped across the six temperatures (Table 1B). All  
400 pairwise covariances were positive (although only 26% were statistically distinct from zero:  
401 Table 1B). The first eigenvalue (35.2; Table 2B) was three times larger than the largest  
402 variance at any individual temperature and accounted for 95% of the total among-family  
403 variance. The contribution of speed at each temperature to this axis of variation (i.e., the  
404 eigenvector loadings: Table 3) were all in the same direction and of similar magnitude.  
405 Therefore, we suggest the data provide evidence that mutations have consistent effects on  
406 speed irrespective of the assay temperature, with no evidence of environment-specific effects.

407

408

## Discussion

409 We detected phenotypic effects of mutation on a complex trait, swimming speed, but did not  
410 detect any mutational variance for the plasticity of speed in response to heterogeneity in  
411 water temperature. Mutations had concordant effects across the 18°C thermal gradient over  
412 which speed itself varied by more than 35cm<sup>-1</sup> second. Our results are consistent with  
413 mutation introducing variation along a vertical shift, or faster-slower mode of thermal  
414 performance variation (Huey and Kingsolver 1989; Izem and Kingsolver 2005). In the only  
415 other study that we are aware of investigating mutational variance in locomotor thermal  
416 performance, Latimer et al. (2014) characterised the contribution of spontaneous mutation to  
417 variance in locomotor activity of *Drosophila serrata*, and similarly reported that most (76%  
418 or 70% in males or females, respectively) mutational variance was associated with a faster-

419 slower mode. This mode of variation is interpreted as reflecting pleiotropic mutations with  
420 consistent direction of effects across all temperatures (Kingsolver et al. 2001), where  
421 selection for increased (or decreased) performance at one temperature would lead to  
422 correlated evolution at all temperatures, and under thermally heterogeneous conditions,  
423 consistent selection would effectively fix (eliminate) variants.  
424  
425 In contrast to mutation predominantly influencing average performance (Latimer et al. 2014),  
426 <1% of standing genetic variation in *D. serrata* was associated with the faster-slower mode;  
427 rather, most variation was aligned with a specialist-generalist mode (where the width of the  
428 performance curve varies) (Latimer et al. 2011). Other studies of standing genetic variation of  
429 thermally dependence in non-locomotor traits have also suggested little genetic variation  
430 associated with the faster-slower mode (e.g., Izem and Kingsolver 2005). Notably, mutational  
431 correlations among life-history traits are typically more strongly positive than the  
432 corresponding standing genetic correlation, reflecting selective elimination of concordantly  
433 deleterious mutations (Houle et al. 1994; Estes and Phillips 2006; McGuigan et al. 2011).  
434 Latimer et al. (2014) similarly suggested that the mismatch of mutational and standing  
435 genetic variation might indicate that most mutations affecting performance are deleterious,  
436 and do not persist in standing genetic variation. However, other studies of standing genetic  
437 variation in thermal performance curves for individual or population-level growth have  
438 provided contradictory evidence, suggesting that most (rather than least) variation is  
439 associated with a faster-slower mode (Yamahira et al. 2007; Moghadam et al. 2020), and  
440 several recent studies of locomotor performance found statistical support for heritability only  
441 of curve height (i.e., faster-slower variation) and not optimal temperature or curve width  
442 (Logan et al. 2018; Martins et al. 2019). To resolve the contrary predictions that standing  
443 genetic variation reflects selective process (Latimer et al. 2014) versus mutational limits

444 (Yamahira et al. 2007) further data on the phenotypic variation introduced by mutation to  
445 thermal performance traits will be required. The distribution of mutations may influence  
446 molecular (Cano et al. 2022) and phenotypic (Houle et al. 2017) adaptation, and  
447 understanding whether standing genetic variation reflects limited input of the type of  
448 variation that would support local versus global adaptation is necessary for predicting  
449 adaptive responses to changing thermal conditions.

450

451 We observed no evidence that mutations had a biased direction of effect on swimming speed,  
452 consistent with a previous investigation of the effects of ENU-induced mutation on WIK  
453 zebrafish prolonged swimming speed at 28°C (McGuigan and Aw 2017). For fitness,  
454 mutation is predicted to be, and empirically supported as, typically biased toward lower  
455 values (Keightley and Lynch 2003; Keightley and Eyre-Walker 2007; Halligan and Keightley  
456 2009). However, theoretical models of the maintenance of genetic variance in non-fitness  
457 traits typically assume no overall directional trend in the effects of mutations (Barton 1990;  
458 Kondrashov and Turelli 1992; Johnson and Barton 2005; Martin and Lenormand 2006);  
459 deviation from this expectation could result in substantial directional selection on traits  
460 (Zhang and Hill 2008). ENU-induced mutations in guppies decreased the rate of courtship  
461 displays (Herdegen and Radwan 2015), while spontaneous mutations decreased *D.*  
462 *melanogaster* larval crawling speed, adult heat tolerance, overall coordination (Huey et al.  
463 2003) and male escape speed (Shabalina et al. 1997), and decreased velocity of  
464 *Caenorhabditis elegans* (Ajie et al. 2005). In contrast, spontaneous mutations decreased *D.*  
465 *serrata* locomotor activity only at the hottest assayed temperatures, increasing activity across  
466 a wide range of cooler temperatures (Latimer et al. 2014). Other performance traits (e.g.,  
467 feeding rate and adult walking speed: Huey et al. 2003) showed no shift in trait mean under  
468 mutation accumulation. Given that these studies of whole-organism performance traits have

469 reported mutational effects that span the full spectrum, further empirical and theoretical  
470 consideration of the evolutionary genetic consequences of non-symmetrical mutations for  
471 non-fitness traits is required. Differences among traits and studies may simply reflect  
472 unpredictable stochastic effects of sampling from the same, complex, distribution of effects.  
473 However, several factors, including study design, the traits themselves, genetic background,  
474 distribution of dominance, and the environmental range considered, may influence the  
475 distribution of phenotypes generated by mutation.

476

477 A challenge faced by classical multi-generational mutation accumulation experiments is  
478 evolution of the ancestor (discussed in Lynch et al. 1999). Some heterogeneity in direction of  
479 effect may reflect estimation errors arising from changes in the ancestor. This problem is  
480 avoided using mutagenesis, where the unmutated comparison population has not had time to  
481 evolve. Notably, while classical mutation accumulation experiments are typically initiated  
482 from a single ancestral genotype (inbred line), mutagenesis experiments introduce mutation  
483 to multiple (here, 50) genetic backgrounds simultaneously. Spontaneous mutation rate (Sharp  
484 and Agrawal 2012; Schrider et al. 2013; Huang et al. 2016) and distribution of mutational  
485 fitness effects (Fisher 1930; Orr 1998; Silander et al. 2007; Stearns and Fenster 2016) are  
486 influenced by ancestral genotype. Whether bias in the direction of mutational effects on non-  
487 fitness traits can be (partially) explained by genetic background, or the contribution of the  
488 trait to fitness, remains to be determined.

489

490 Observation of both thermally dependent and directionally biased effects of mutations may  
491 also be influenced by dominance. We focused here on heterozygous effects: new mutations  
492 will be expressed only in heterozygotes due to their rarity, and it is therefore their  
493 heterozygous effect that will determine the selection they experience. Our observation that

494 mutation significantly increased genetic (among-family) variance in speed indicates that at  
495 least some induced mutations were not fully recessive in their effects on the focal trait.  
496 Mutations with larger homozygous deleterious effects on fitness tend to be more recessive  
497 (Agrawal and Whitlock 2011), but the joint distribution of dominance coefficients of  
498 pleiotropic mutations affecting fitness and other traits is not well characterised. Mutations  
499 causing notable defects in larval swimming performance have been reported to be typically  
500 homozygous lethal (Granato et al. 1996), suggesting directional dominance on fitness is  
501 correlated with directionality of effects on speed for these large-effect mutations. Similarly, a  
502 study of a large cohort of racehorses found evidence of a negative correlation between an  
503 individual's inbreeding coefficient and race performance, consistent with correlation of  
504 directional dominance of fitness with effects on performance (Todd et al. 2018). Correlated  
505 environment-dependent reversals in dominance (recessive to dominant) and fitness  
506 (deleterious to beneficial) effects of mutations are predicted to accelerate adaptation  
507 (Muralidhar and Veller 2022). Here, the observed concordance of mutational effects on speed  
508 are not consistent with environment-dependent changes in the dominance coefficient.  
509 Nonetheless, our data cannot exclude the possibility of an unobserved class of undetected  
510 mutations with recessive effects that had directionally biased, or non-concordant pleiotropic  
511 effects (antagonistic or conditionally neutral), shifting mean speed and generating genotype-  
512 by-environment interaction variation.

513

514 We assayed a set range of temperatures (16°C – 34°C), and while speed varied markedly with  
515 temperature, it was nonetheless notable that average speed changed very little between 28°C  
516 and 34°C (Figure 1). We cannot exclude the possibility that the effects of the sampled  
517 mutations on swimming speed were different outside the considered thermal range. The  
518 frequency distribution of fitness effects may be shifted under hotter temperatures (Xu 2004;

519 Chu et al. 2020). However, direct effect of temperature on population growth rate in  
520 microbes, where population size limits (bottlenecks) are not imposed per generation, may  
521 allow greater opportunity for selection to shift the observed frequency of mutations at hot  
522 relative to cool temperatures (Wahl and Agashe 2022), with stronger selection on deleterious  
523 mutations under hotter conditions (Berger et al. 2021).

524

525 Consistent with Latimer et al. (2014), we assessed adult phenotypes under acute exposure to  
526 different temperatures. The timing and duration of exposure to heterogeneous environments  
527 can affect thermal performances (Rezende et al. 2014; Kellermann et al. 2019; Pottier et al.  
528 2022), and the observed distribution of mutational effects may likewise change. Fully  
529 replicating multiple rearing temperatures to impose long-term exposure, (e.g., through larval  
530 development) is logistically limiting. Further, temperature-dependent effects on larval  
531 viability may result in the phenotypic effects of different mutations being sampled at different  
532 temperatures. Selection acting among siblings within a family of an ENU mutated sire can  
533 affect the frequency of mutations within families and observation of their phenotypic effects  
534 (Walsh and McGuigan 2018). Temperature also affects development rate in ectotherms,  
535 potentially result in confounding of the effects of mutation, development and temperature.

536 We previously showed swimming speed in adult zebrafish changes with age, independent of  
537 size or known maturation and senescence boundaries (McGuigan and Aw 2017). While  
538 natural populations encounter varying temperatures throughout life, disentangling how  
539 genetic effects cause plastic responses to that variation is challenging.

540

541 Our results by no means suggest the absence of any class of mutations with non-concordant  
542 pleiotropic effects across temperatures. Quantitative genetic parameters are notoriously  
543 difficult to accurately estimate, given their relatively large sampling error (Klein et al. 1973;

544 Klein 1974). Notably, standing genetic variance for thermal performance traits was below  
545 statistical detection limits in several recent studies (Driessen et al. 2007; Logan et al. 2018;  
546 Martins et al. 2019; Logan et al. 2020; Bodensteiner et al. 2021). Our results (limited  
547 statistical support for heritable variation per temperature, but strong support for heritable  
548 variation in speed when considering all data) suggest that, given the pervasive presence of  
549 temperature-independent mutational effects, we benefited from repeated measures of the  
550 same phenotype to improve estimation. A recent investigation suggested that sampling error  
551 is likely to make a non-negligible contribution to heterogeneity among estimates of  
552 mutational variance (Conradsen et al. 2022). Similarly, a recent meta-analysis of population  
553 means of thermal physiological limit traits suggested that < 8% of 428 estimates were  
554 supported by sufficient sample sizes for the mean to be estimated with a high-level of  
555 accuracy (Duffy et al. 2021). Thermally dependent traits are likely to remain the focus of  
556 understanding how populations can persist under and adapt to changing conditions, but we  
557 suggest that the experimental effort involved in obtaining useful and robust parameter  
558 estimates is far from trivial, while the risk of inaccurate estimation must also be carefully  
559 considered. In the current study, we collected a total of 3,497 measures of speed, which took  
560 677 person hours to record (without accounting for time taken for acclimating fish prior to  
561 trials, or any aspect of breeding and husbandry). Without additional information on the  
562 relative frequency and effect size of mutations with thermally dependent effects it is not  
563 simple to predict how much larger an experiment will be required to detect, above  
564 measurement error, and characterise other, non-concordant patterns of variation across  
565 temperatures. The apparent benefit of repeated measures suggests that improved precision of  
566 measurement of performance (via within individual and within family replication) will be  
567 important, along with increasing the number of genotypes (families), which would support  
568 sampling of more mutations.



569

570 Mutagenesis could greatly expand the range of taxa in which the distribution of mutational  
571 effects on phenotype (and fitness) can be explored. The mutational variance we observed for  
572 sprint speed was greater than the per-generation rate of mutational input reported from  
573 classical mutation accumulation (MA) studies of related traits (Figure 2), suggesting that we  
574 had induced more mutations than typically sampled in long-running MA experiments  
575 (although differences in effect size or the greater mutational target size of speed than an  
576 individual enzyme or metabolite may also have contributed). Ideally, as is possible in  
577 microbial systems, phenotypic effects of individual mutations would be considered.  
578 However, isolating individual mutations to characterise their effect remains challenging in  
579 higher eukaryotes. Genome sequencing of multicellular eukaryote MA lines, maintained over  
580 tens to hundreds of generations, typically reveal multiple (~20 – 90) mutations per line  
581 accumulating over these time frames (Schridder et al. 2013; Huang et al. 2016; Assaf et al.  
582 2017; Flynn et al. 2017). When MA lines (or here, families) diverge from one another at  
583 multiple loci, strong correlations among traits (here, speed at the different temperatures) can  
584 arise through both heterogeneity of mutation number among lines or via linkage, but such  
585 spurious correlations depend on mutations having biased, unidirectional, effects on the traits  
586 (Keightley et al. 2000). However, co-segregation of mutations having opposing effects on the  
587 same traits may have obscured patterns arising from more complex (antagonistic or  
588 conditionally independent) pleiotropic effects. More generally, epistatic interactions among  
589 mutations may influence the observed patterns of phenotypic variation, as apparent in the  
590 effect of genetic background on the frequency of beneficial mutations (Silander et al. 2007;  
591 Perfeito et al. 2014; Stearns and Fenster 2016). In the current experiment, there was potential  
592 for epistatic interactions to influence observed patterns of phenotypic variation both due to

593 among-sire differences in their genotype (i.e., genetic background), and due to the specific set  
594 of mutations induced in each sire.

595

596 Further information is also required on how well the induced mutations reflect the spectrum  
597 of naturally arising mutations (Katju and Bergthorsson 2019). The zebrafish genome is large  
598 (1400 Mb) relative to other multicellular eukaryotic taxa for which extensive mutational data  
599 exist (100 – 200 Mb for *D. melanogaster*, *Daphia pulex*, *Caenorhabditis* species and  
600 *Arabidopsis thaliana*), and, in contrast to these other models in which a genetically  
601 homogeneous ancestor can be rapidly established, the longer generation time of zebrafish  
602 (and other vertebrates) makes this more challenging. Novel mutations must therefore be  
603 accurately detected against a background segregating genetic variation (Coe et al. 2009;  
604 Brown et al. 2012; Butler et al. 2015; Suurvali et al. 2020). Thus, while studies of zebrafish  
605 (and other vertebrate models) can exploit considerable genomic tools, dissecting  
606 contributions from overall mutation number versus effect sizes will be challenging.

607

608 Heterogeneity in allelic effects among environmental contexts contribute to phenotypic  
609 diversity and adaptive potential of natural populations. The role of mutation in shaping the  
610 distribution of this diversity has the potential to influence direction and rate of evolution of  
611 populations. The limited amount of evidence to date suggests that mutations with concordant  
612 effects across thermal gradients are more frequent or of larger effect than mutations with  
613 antagonistic or conditionally neutral effects. However, the patterns of intra and inter-specific  
614 genetic diversity of thermally dependent traits suggest major contributions from genetic  
615 variants with non-concordant (antagonistic or conditionally neutral) effects. Further  
616 investigation of mutational effects is required to reconcile these observations. Studies  
617 addressing this knowledge gap will need to be large, ensuring that effects can be accurately

618 determined. Mutagenesis may facilitate studies across more taxa, and reduce the logistical  
619 burden of long-term maintenance.

620

## Acknowledgments

621 We thank Nick Appleton, Ash Kannan, and Laura Davis for their contributions to data  
622 collection and fish husbandry. We also thank The University of Queensland Biological  
623 Resources Aquatics Team for their assistance with husbandry and maintenance of life-  
624 support systems. This work was funded by the Australian Research Council DP180101801  
625 awarded to KM. The authors declare no conflicts of interest.

626

## References

- 627 Agrawal, A. F., and M. C. Whitlock. 2010. Environmental duress and epistasis: How does  
628 stress affect the strength of selection on new mutations? *Trends in Ecology &*  
629 *Evolution* 25:450-458.
- 630 —. 2011. Inferences about the distribution of dominance drawn from yeast gene knockout  
631 data. *Genetics* 187:553-566.
- 632 Ajie, B. C., S. Estes, M. Lynch, and P. C. Phillips. 2005. Behavioral degradation under  
633 mutation accumulation in *Caenorhabditis elegans*. *Genetics* 170:655-660.
- 634 Angilletta, M. J. 2009, *Thermal Adaptation: A Theoretical and Empirical Synthesis*, Oxford  
635 University Press.
- 636 Arunachalam, M., M. Raja, C. Vijayakumar, P. Malaiammal, and R. L. Mayden. 2013.  
637 Natural history of zebrafish (*Danio rerio*) in India. *Zebrafish* 10:1-14.
- 638 Assaf, Z. J., S. Tilk, J. Park, M. L. Siegal, and D. A. Petrov. 2017. Deep sequencing of  
639 natural and experimental populations of *Drosophila melanogaster* reveals biases in  
640 the spectrum of new mutations. *Genome Research* 27:1988-2000.
- 641 Baer, C. F., N. Phillips, D. Ostrow, A. Avalos, D. Blanton, A. Boggs, T. Keller et al. 2006.  
642 Cumulative effects of spontaneous mutations for fitness in *Caenorhabditis*: Role of  
643 genotype, environment and stress. *Genetics* 174:1387-1395.

- 644 Barrett, R. D. H., S. M. Rogers, and D. Schluter. 2009. Environment specific pleiotropy  
645 facilitates divergence at the *Ectodysplasin* locus in threespine stickleback. *Evolution*  
646 63:2831-2837.
- 647 Barton, N. H. 1990. Pleiotropic models of quantitative variation. *Genetics* 124:773-782.
- 648 Berger, D., J. Stangberg, J. Baur, and R. J. Walters. 2021. Elevated temperature increases  
649 genome-wide selection on de novo mutations. *Proceedings of the Royal Society B-*  
650 *Biological Sciences* 288:20203094.
- 651 Bodensteiner, B. L., G. A. Agudelo-Cantero, A. Z. A. Arietta, A. R. Gunderson, M. M.  
652 Munoz, J. M. Refsnider, and E. J. Gangloff. 2021. Thermal adaptation revisited: How  
653 conserved are thermal traits of reptiles and amphibians? *Journal of Experimental*  
654 *Zoology Part A - Ecological and Integrative Physiology* 335:173-194.
- 655 Brett, J. R. 1964. The respiratory metabolism and swimming performance of young sockeye  
656 salmon. *Journal of the Fisheries Research Board of Canada* 21:1183-1226.
- 657 Brown, K. H., K. P. Dobrinski, A. S. Lee, O. Gokcumen, R. E. Mills, X. H. Shi, W. W. S.  
658 Chong et al. 2012. Extensive genetic diversity and substructuring among zebrafish  
659 strains revealed through copy number variant analysis. *Proceedings of the National*  
660 *Academy of Sciences of the United States of America* 109:529-534.
- 661 Bürger, R. 2000, *The Mathematical Theory of Selection, Recombination, and Mutation*,  
662 Wiley Chichester.
- 663 Butler, M. G., J. R. Iben, K. C. Marsden, J. A. Epstein, M. Granato, and B. M. Weinstein.  
664 2015. SNPfisher: tools for probing genetic variation in laboratory-reared zebrafish.  
665 *Development* 142:1542-1552.
- 666 Cano, A. V., H. Rozhonova, A. Stoltzfus, D. M. McCandlish, and J. L. Payne. 2022.  
667 Mutation bias shapes the spectrum of adaptive substitutions. *Proceedings of the*  
668 *National Academy of Sciences of the United States of America* 119:e2119720119.

- 669 Careau, V., and T. Garland, Jr. 2012. Performance, personality, and energetics: Correlation,  
670 causation, and mechanism. *Physiological and Biochemical Zoology* 85:543-571.
- 671 Chu, X. L., D. Y. Zhang, A. Buckling, and Q. G. Zhang. 2020. Warmer temperatures enhance  
672 beneficial mutation effects. *Journal of Evolutionary Biology* 33:1020-1027.
- 673 Clark, A. G., L. Wang, and T. Hulleberg. 1995. Spontaneous mutation-rate of modifiers of  
674 metabolism in *Drosophila*. *Genetics* 139:767-779.
- 675 Coe, T. S., P. B. Hamilton, A. M. Griffiths, D. J. Hodgson, M. A. Wahab, and C. R. Tyler.  
676 2009. Genetic variation in strains of zebrafish (*Danio rerio*) and the implications for  
677 ecotoxicology studies. *Ecotoxicology* 18:144-150.
- 678 Condon, C. H., S. F. Chenoweth, and R. S. Wilson. 2010. Zebrafish take their cue from  
679 temperature but not photoperiod for the seasonal plasticity of thermal performance.  
680 *Journal of Experimental Biology* 213:3705-3709.
- 681 Conradsen, C., M. W. Blows, and K. McGuigan. 2022. Causes of variability in estimates of  
682 mutational variance from mutation accumulation experiments. *Genetics* 221:iyac060.
- 683 Conradsen, C., and K. McGuigan. 2015. Sexually dimorphic morphology – performance  
684 relationships in wildtype zebrafish. *Journal of Fish Biology* 87:1219-1233.
- 685 Conradsen, C., J. A. Walker, C. Perna, and K. McGuigan. 2016. Repeatability of locomotor  
686 performance and morphology–locomotor performance relationships. *Journal of*  
687 *Experimental Biology* 219:2888-2897.
- 688 da Silva, J. M., A. Herrel, G. J. Measey, B. Vanhooydonck, and K. A. Tolley. 2014. Linking  
689 microhabitat structure, morphology and locomotor performance traits in a recent  
690 radiation of dwarf chameleons. *Functional Ecology* 28:702-713.
- 691 Davies, S. K., A. Leroi, A. Burt, J. G. Bundy, and C. F. Baer. 2016. The mutational structure  
692 of metabolism in *Caenorhabditis elegans*. *Evolution* 70:2239-2246.

- 693 de Bruijn, E., E. Cuppen, and H. Feitsma. 2009. Highly efficient ENU mutagenesis in  
694 zebrafish. *Zebrafish: Methods in Molecular Biology* 546:3-12.
- 695 de Jong, G. 1990. Quantitative genetics of reaction norms. *Journal of Evolutionary Biology*  
696 3:447-468.
- 697 de Jong, G., and S. Gavrilets. 2000. Maintenance of genetic variation in phenotypic plasticity:  
698 the role of environmental variation. *Genetical Research* 76:295-304.
- 699 Des Marais, D. L., K. M. Hernandez, and T. E. Juenger. 2013. Genotype-by-environment  
700 interaction and plasticity: Exploring genomic responses of plants to the abiotic  
701 environment. *Annual Review of Ecology, Evolution, and Systematics* 44:5-29.
- 702 Driessen, G., J. Ellers, and N. M. Van Straalen. 2007. Variation, selection and heritability of  
703 thermal reaction norms for juvenile growth in *Orchesella cincta* (Collembola :  
704 Entomobryidae). *European Journal of Entomology* 104:39-46.
- 705 Duffy, G. A., A. C. Kuyucu, J. L. Hoskins, E. M. Hay, and S. L. Chown. 2021. Adequate  
706 sample sizes for improved accuracy of thermal trait estimates. *Functional Ecology*  
707 35:2647-2662.
- 708 Dugand, R. J., J. D. Aguirre, E. Hine, M. W. Blows, and K. McGuigan. 2021. The  
709 contribution of mutation and selection to multivariate quantitative genetic variance in  
710 an outbred population of *Drosophila serrata*. *Proceedings of the National Academy*  
711 *of Sciences of the United States of America* 118:e2026217118.
- 712 Engeszer, R. E., L. B. Patterson, A. A. Rao, and D. M. Parichy. 2007. Zebrafish in the wild:  
713 A review of natural history and new notes from the field. *Zebrafish* 4:21-38.
- 714 Estes, S., B. C. Ajie, M. Lynch, and P. C. Phillips. 2005. Spontaneous mutational correlations  
715 for life-history, morphological and behavioral characters in *Caenorhabditis elegans*.  
716 *Genetics* 170:645-653.

- 717 Estes, S., and P. C. Phillips. 2006. Variation in pleiotropy and the mutational underpinnings  
718 of the G-matrix. *Evolution* 60:2655-2660.
- 719 Felsenstein, J. 1976. Theoretical population-genetics of variable selection and migration.  
720 *Annual Review of Genetics* 10:253-280.
- 721 Fisher, R. A. 1930, *The Genetical Theory of Natural Selection*. Oxford, Clarendon Press.
- 722 Flynn, J. M., F. J. J. Chain, D. J. Schoen, and M. E. Cristescu. 2017. Spontaneous mutation  
723 accumulation in *Daphnia pulex* in selection-free vs. Competitive environments.  
724 *Molecular Biology and Evolution* 34:160-173.
- 725 Fry, J. D., and S. L. Heinsohn. 2002. Environment dependence of mutational parameters for  
726 viability in *Drosophila melanogaster*. *Genetics* 161:1155-1167.
- 727 Fu, S.-J., Z.-D. Cao, G.-J. Yan, C. Fu, and X. Pang. 2013. Integrating environmental  
728 variation, predation pressure, phenotypic plasticity and locomotor performance.  
729 *Oecologia* 173:343-354.
- 730 Gabriel, W., M. Lynch, and R. Burger. 1993. Mullers Ratchet and Mutational Meltdowns.  
731 *Evolution* 47:1744-1757.
- 732 Gomulkiewicz, R., J. G. Kingsolver, P. A. Carter, and N. Heckman. 2018. Variation and  
733 evolution of function-valued traits. *Annual Review of Ecology Evolution and*  
734 *Systematics* 49:139-164.
- 735 Granato, M., F. J. M. vanEeden, U. Schach, T. Trowe, M. Brand, M. FurutaniSeiki, P. Haffter  
736 et al. 1996. Genes controlling and mediating locomotion behavior of the zebrafish  
737 embryo and larva. *Development* 123:399-413.
- 738 Griswold, C. K., R. Gomulkiewicz, and N. Heckman. 2008. Hypothesis testing in  
739 comparative and experimental studies of function-valued traits. *Evolution* 62:1229-  
740 1242.



- 741 Hairston, N. G., S. P. Ellner, M. A. Geber, T. Yoshida, and J. A. Fox. 2005. Rapid evolution  
742 and the convergence of ecological and evolutionary time. *Ecology Letters* 8:1114-  
743 1127.
- 744 Halligan, D. L., and P. D. Keightley. 2009. Spontaneous mutation accumulation studies in  
745 evolutionary genetics. *Annual Review of Ecology Evolution and Systematics* 40:151-  
746 172.
- 747 Harada, K. 1995. A quantitative analysis of modifier mutations which occur in mutation  
748 accumulation lines in *Drosophila melanogaster*. *Heredity* 75:589-598.
- 749 Hendry, A. P., and M. T. Kinnison. 1999. Perspective: The pace of modern life: Measuring  
750 rates of contemporary microevolution. *Evolution* 53:1637-1653.
- 751 Herdegen, M., and J. Radwan. 2015. Effect of induced mutations on sexually selected traits  
752 in the guppy, *Poecilia reticulata*. *Animal Behaviour* 110:105-111.
- 753 Hereford, J. 2009. A quantitative survey of local adaptation and fitness trade-offs. *American*  
754 *Naturalist* 173:579-588.
- 755 Hine, E., and M. W. Blows. 2006. Determining the effective dimensionality of the genetic  
756 variance-covariance matrix. *Genetics* 173:1135-1144.
- 757 Hitotsumachi, S., D. A. Carpenter, and W. L. Russell. 1985. Dose-repetition increases the  
758 mutagenic effectiveness of N-ethyl-nitrosourea in mouse spermatogonia. *Proceedings*  
759 *of the National Academy of Sciences of the United States of America* 82:6619-6621.
- 760 Hochachka, P. W., and G. N. Somero. 2002, *Biochemical adaptation: mechanism and process*  
761 *in physiological evolution*. New York, Oxford University Press.
- 762 Houle, D., G. H. Bolstad, K. van der Linde, and T. F. Hansen. 2017. Mutation predicts 40  
763 million years of fly wing evolution. *Nature* 548:447-450.

- 764 Houle, D., K. A. Hughes, D. K. Hoffmaster, J. Ihara, S. Assimacopoulos, D. Canada, and B.  
765 Charlesworth. 1994. The effects of spontaneous mutation on quantitative traits .1.  
766 Variances and covariances of life history traits. *Genetics* 138:773-785.
- 767 Houle, D., and K. Meyer. 2015. Estimating sampling error of evolutionary statistics based on  
768 genetic covariance matrices using maximum likelihood. *Journal of Evolutionary*  
769 *Biology* 28:1542-1549.
- 770 Huang, W., R. F. Lyman, R. A. Lyman, M. A. Carbone, S. T. Harbison, M. M. Magwire, and  
771 T. F. Mackay. 2016. Spontaneous mutations and the origin and maintenance of  
772 quantitative genetic variation. *Elife* 5:e14625.
- 773 Huey, R. B., G. W. Gilchrist, K. Ward, L. Maves, D. Pepin, and D. Houle. 2003. Mutation  
774 accumulation, performance, fitness. *Integrative and Comparative Biology* 43:387-395.
- 775 Huey, R. B., and J. G. Kingsolver. 1989. Evolution of thermal sensitivity of ectotherm  
776 performance. *Trends in Ecology & Evolution* 4:131-135.
- 777 Husak, J. F., and S. F. Fox. 2008. Sexual selection on locomotor performance. *Evolutionary*  
778 *Ecology Research* 10:213-228.
- 779 Irschick, D. J., and T. Garland. 2001. Integrating function and ecology in studies of  
780 adaptation: Investigations of locomotor capacity as a model system. *Annual Review*  
781 *of Ecology and Systematics* 32:367-396.
- 782 Irschick, D. J., J. J. Meyers, J. F. Husak, and J. F. Le Galliard. 2008. How does selection  
783 operate on whole-organism functional performance capacities? A review and  
784 synthesis. *Evolutionary Ecology Research* 10:177-196.
- 785 Izem, R., and J. G. Kingsolver. 2005. Variation in continuous reaction norms: Quantifying  
786 directions of biological interest. *American Naturalist* 166:277-289.
- 787 Jayne, B. C., and A. F. Bennett. 1990. Selection on locomotor performance capacity in a  
788 natural population of garter snakes. *Evolution* 44:1204-1229.

- 789 Johnson, T., and N. Barton. 2005. Theoretical models of selection and mutation on  
790 quantitative traits. *Philosophical Transactions of the Royal Society B-Biological*  
791 *Sciences* 360:1411-1425.
- 792 Josephs, E. B. 2018. Determining the evolutionary forces shaping G x E. *New Phytologist*  
793 219:31-36.
- 794 Katju, V., and U. Bergthorsson. 2019. Old trade, new tricks: insights into the spontaneous  
795 mutation process from the partnering of classical mutation accumulation experiments  
796 with high-throughput genomic approaches. *Genome Biology and Evolution* 11:136-  
797 165.
- 798 Keightley, P. D., E. K. Davies, A. D. Peters, and R. G. Shaw. 2000. Properties of  
799 ethylmethane sulfonate-induced mutations affecting life-history traits in  
800 *Caenorhabditis elegans* and inferences about bivariate distributions of mutation  
801 effects. *Genetics* 156:143-154.
- 802 Keightley, P. D., and A. Eyre-Walker. 2007. Joint inference of the distribution of fitness  
803 effects of deleterious mutations and population demography based on nucleotide  
804 polymorphism frequencies. *Genetics* 177:2251-2261.
- 805 Keightley, P. D., and M. Lynch. 2003. Toward a realistic model of mutations affecting  
806 fitness. *Evolution* 57:683-685.
- 807 Kellermann, V., S. L. Chown, M. F. Schou, I. Aitkenhead, C. Janion-Scheepers, A. Clemson,  
808 M. T. Scott et al. 2019. Comparing thermal performance curves across traits: How  
809 consistent are they? *Journal of Experimental Biology* 222:jeb193433.
- 810 Kern, E. M. A., and R. B. Langerhans. 2019. Urbanization alters swimming performance of a  
811 stream fish. *Frontiers in Ecology and Evolution* 6:229.
- 812 Kingsolver, J. G., R. Gomulkiewicz, and P. A. Carter. 2001. Variation, selection and  
813 evolution of function-valued traits. *Genetica* 112:87-104.

- 814 Kirkpatrick, M., and N. Heckman. 1989. A quantitative genetic model for growth, shape,  
815 reaction norms, and other infinite-dimensional characters. *Journal of Mathematical*  
816 *Biology* 27:429-450.
- 817 Klein, T. W. 1974. Heritability and genetic correlation: Statistical power, population  
818 comparisons and sample size. *Behavior Genetics* 4:171-189.
- 819 Klein, T. W., J. C. De Vries, and C. T. Finkbeiner. 1973. Heritability and genetic correlation:  
820 Standard errors of estimates and sample size. *Behavior Genetics* 3:355-364.
- 821 Knapik, E. W. 2000. ENU mutagenesis in zebrafish - from genes to complex diseases.  
822 *Mammalian Genome* 11:511-519.
- 823 Kondrashov, A. S., and M. Turelli. 1992. Deleterious mutations, apparent stabilizing  
824 selection and the maintenance of quantitative variation. *Genetics* 132:603-618.
- 825 Latimer, C. A., K. McGuigan, R. S. Wilson, M. W. Blows, and S. F. Chenoweth. 2014. The  
826 contribution of spontaneous mutations to thermal sensitivity curve variation in  
827 *Drosophila serrata*. *Evolution* 68:1824-1837.
- 828 Latimer, C. A. L., R. S. Wilson, and S. F. Chenoweth. 2011. Quantitative genetic variation  
829 for thermal performance curves within and among natural populations of *Drosophila*  
830 *serrata*. *Journal of Evolutionary Biology* 24:965-975.
- 831 Leimu, R., and M. Fischer. 2008. A meta-analysis of local adaptation in plants. *Plos One*  
832 3:e4010.
- 833 Li, Y., R. Y. Cheng, K. A. Spokas, A. A. Palmer, and J. O. Borevitz. 2014. Genetic variation  
834 for life history sensitivity to seasonal warming in *Arabidopsis thaliana*. *Genetics*  
835 196:569-577.
- 836 Logan, M. L., J. D. Curlis, A. L. Gilbert, D. B. Miles, A. K. Chung, J. W. McGlothlin, and R.  
837 M. Cox. 2018. Thermal physiology and thermoregulatory behaviour exhibit low

- 838 heritability despite genetic divergence between lizard populations. *Proceedings of the*  
839 *Royal Society B-Biological Sciences* 285:20180697.
- 840 Logan, M. L., I. A. Minnaar, K. M. Keegan, and S. Clusella-Trullas. 2020. The evolutionary  
841 potential of an insect invader under climate change. *Evolution* 74:132-144.
- 842 Lorch, P. D., S. Proulx, L. Rowe, and T. Day. 2003. Condition-dependent sexual selection  
843 can accelerate adaptation. *Evolutionary Ecology Research* 5:867-881.
- 844 Lynch, M., J. Blanchard, D. Houle, T. Kibota, S. Schultz, L. Vassilieva, and J. Willis. 1999.  
845 Spontaneous deleterious mutation. *Evolution* 53:645-663.
- 846 Lynch, M., and W. Gabriel. 1990. Mutation load and the survival of small populations.  
847 *Evolution* 44:1725-1737.
- 848 Martin, G., and T. Lenormand. 2006. The fitness effect of mutations across environments: A  
849 survey in light of fitness landscape models. *Evolution* 60:2413-2427.
- 850 Martins, F., L. Kruuk, J. Llewelyn, C. Moritz, and B. Phillips. 2019. Heritability of climate-  
851 relevant traits in a rainforest skink. *Heredity* 122:41-52.
- 852 McClure, M. M., P. B. McIntyre, and A. R. McCune. 2006. Notes on the natural diet and  
853 habitat of eight danionin fishes, including the zebrafish *Danio rerio*. *Journal of Fish*  
854 *Biology* 69:553-570.
- 855 McGuigan, K., and J. D. Aguirre. 2016. Quantitative genetic variation, comparing patterns of,  
856 Pages 377–387 in R. M. Kliman, ed. *Encyclopedia of Evolutionary Biology*. Oxford,  
857 Academic Press.
- 858 McGuigan, K., and E. Aw. 2017. How does mutation affect the distribution of phenotypes?  
859 *Evolution* 71:2445–2456.
- 860 McGuigan, K., C. E. F. Franklin, C. Moritz, and M. W. Blows. 2003. Adaptation of rainbow  
861 fish to lake and stream habitats. *Evolution* 57:104-118.

- 862 McGuigan, K., D. Petfield, and M. W. Blows. 2011. Reducing mutation load through sexual  
863 selection on males. *Evolution* 65:2816-2829.
- 864 Mee, J. A., and S. Yeaman. 2019. Unpacking conditional neutrality: Genomic signatures of  
865 selection on conditionally beneficial and conditionally deleterious mutations.  
866 *American Naturalist* 194:529-540.
- 867 Meyer, K., and D. Houle. 2013, Sampling based approximation of confidence intervals for  
868 functions of genetic covariance matrices *Proceedings of the Twentieth Conference of*  
869 *the Association for the Advancement of Animal Breeding and Genetics* 20:523-526.
- 870 Moghadam, N. N., K. Sidhu, P. A. M. Summanen, T. Ketola, and I. Kronholm. 2020.  
871 Quantitative genetics of temperature performance curves of *Neurospora crassa*.  
872 *Evolution* 74:1772-1787.
- 873 Mullins, M. C., M. Hammerschmidt, P. Haffter, and C. Nussleinvolhard. 1994. Large-scale  
874 mutagenesis in the zebrafish: In search of genes controlling development in a  
875 vertebrate. *Current Biology* 4:189-202.
- 876 Muralidhar, P., and C. Veller. 2022. Dominance shifts increase the likelihood of soft selective  
877 sweeps. *Evolution* 76:966-984.
- 878 Nelson, J. A., P. S. Gotwalt, C. A. Simonetti, and J. W. Snodgrass. 2008. Environmental  
879 correlates, plasticity, and repeatability of differences in performance among blacknose  
880 dace (*Rhinichthys atratulus*) populations across a gradient of urbanization.  
881 *Physiological and Biochemical Zoology* 81:25-42.
- 882 Noveroske, J. K., J. S. Weber, and M. J. Justice. 2000. The mutagenic action of N-ethyl-N-  
883 nitrosourea in the mouse. *Mammalian Genome* 11:478-483.
- 884 Orr, H. A. 1998. The population genetics of adaptation: The distribution of factors fixed  
885 during adaptive evolution. *Evolution* 52:935-949.

- 886 Ostrowski, E. A., D. E. Rozen, and R. E. Lenski. 2005. Pleiotropic effects of beneficial  
887 mutations in *Escherichia coli*. *Evolution* 59:2343-2352.
- 888 Perfeito, L., A. Sousa, T. Bataillon, and I. Gordo. 2014. Rates of fitness decline and rebound  
889 suggest pervasive epistasis. *Evolution* 68:150-162.
- 890 Pottier, P., S. Burke, R. Y. Zhang, D. W. A. Noble, L. E. Schwanz, S. M. Drobniak, and S.  
891 Nakagawa. 2022. Developmental plasticity in thermal tolerance: Ontogenetic  
892 variation, persistence, and future directions. *Ecology Letters*  
893 <https://doi.org/10.1111/ele.14083>.
- 894 R Core Team. 2020. R: A language and environment for statistical computing. R Foundation  
895 for Statistical Computing, Vienna, Austria. <https://www.R-project.org/>.
- 896 Ransom, D. G., and L. I. Zon. 1999. Collection, storage, and use of zebrafish sperm. *Methods*  
897 in Cell Biology 60:365-372.
- 898 Rauch, G.-J., M. Granato, and P. Haffter. 1997. A polymorphic zebrafish line for genetic  
899 mapping using SSLPs on high-percentage agarose gels. *Technical Tips Online* 2:148-  
900 150.
- 901 Reidy, S. P., S. R. Kerr, and J. A. Nelson. 2000. Aerobic and anaerobic swimming  
902 performance of individual Atlantic cod. *Journal of Experimental Biology* 203:347-  
903 357.
- 904 Rezende, E. L., L. E. Castaneda, and M. Santos. 2014. Tolerance landscapes in thermal  
905 ecology. *Functional Ecology* 28:799-809.
- 906 Reznick, D. N., J. Losos, and J. Travis. 2019. From low to high gear: there has been a  
907 paradigm shift in our understanding of evolution. *Ecology Letters* 22:233-244.
- 908 Rohner, N., S. Perathoner, H. G. Frohnhof, and M. P. Harris. 2011. Enhancing the  
909 efficiency of N-ethyl-N-nitrosourea-induced mutagenesis in the zebrafish. *Zebrafish*  
910 8:119-123.

- 911 Roles, A. J., M. T. Rutter, I. Dworkin, C. B. Fenster, and J. K. Conner. 2016. Field  
912 measurements of genotype by environment interaction for fitness caused by  
913 spontaneous mutations in *Arabidopsis thaliana*. *Evolution* 70:1039-1050.
- 914 Rutter, M. T., A. J. Roles, and C. B. Fenster. 2018. Quantifying natural seasonal variation in  
915 mutation parameters with mutation accumulation lines. *Ecology and Evolution*  
916 8:5575-5585.
- 917 Saltz, J. B., A. M. Bell, J. Flint, R. Gomulkiewicz, K. A. Hughes, and J. Keagy. 2018. Why  
918 does the magnitude of genotype-by-environment interaction vary? *Ecology and*  
919 *Evolution* 8:6342-6353.
- 920 Sane, M., J. J. Miranda, and D. Agashe. 2018. Antagonistic pleiotropy for carbon use is rare  
921 in new mutations. *Evolution* 72:2202-2213.
- 922 SAS Institute Inc. 2012. SAS, version 9.4, Cary, N.C. U.S.A.
- 923 Schridder, D. R., D. Houle, M. Lynch, and M. W. Hahn. 2013. Rates and genomic  
924 consequences of spontaneous mutational events in *Drosophila melanogaster*.  
925 *Genetics* 194:937-954.
- 926 Shabalina, S. A., L. Y. Yampolsky, and A. S. Kondrashov. 1997. Rapid decline of fitness in  
927 panmictic populations of *Drosophila melanogaster* maintained under relaxed natural  
928 selection. *Proceedings of the National Academy of Sciences of the United States of*  
929 *America* 94:13034-13039.
- 930 Sharp, N. P., and A. F. Agrawal. 2012. Evidence for elevated mutation rates in low-quality  
931 genotypes. *Proceedings of the National Academy of Sciences of the United States of*  
932 *America* 109:6142-6146.
- 933 Silander, O. K., O. Tenailon, and L. Chao. 2007. Understanding the evolutionary fate of  
934 finite populations: The dynamics of mutational effects. *PLoS Biology* 5:922-931.



- 935 Spence, R., M. K. Fatema, M. Reichard, K. A. Huq, M. A. Wahab, Z. F. Ahmed, and C.  
936 Smith. 2006. The distribution and habitat preferences of the zebrafish in Bangladesh.  
937 *Journal of Fish Biology* 69:1435-1448.
- 938 Starrs, D., B. C. Ebner, M. Lintermans, and C. J. Fulton. 2011. Using sprint swimming  
939 performance to predict upstream passage of the endangered Macquarie perch in a  
940 highly regulated river. *Fisheries Management and Ecology* 18:360-374.
- 941 Stearns, F. W., and C. B. Fenster. 2016. Fisher's geometric model predicts the effects of  
942 random mutations when tested in the wild. *Evolution* 70:495-501.
- 943 Stewart, B., N. Gruenheit, A. Baldwin, R. Chisholm, D. Rozen, A. Harwood, J. B. Wolf et al.  
944 2022. The genetic architecture underlying prey-dependent performance in a microbial  
945 predator. *Nature Communications* 13.
- 946 Suurvali, J., A. R. Whiteley, Y. C. Zheng, K. Gharbi, M. Leptin, and T. Wiehe. 2020. The  
947 laboratory domestication of zebrafish: From diverse populations to inbred substrains.  
948 *Molecular Biology and Evolution* 37:1056-1069.
- 949 Sztepanacz, J. L., and M. W. Blows. 2017. Accounting for sampling error in genetic  
950 eigenvalues using random matrix theory. *Genetics* 206:1271-1284.
- 951 Todd, E. T., S. Y. W. Ho, P. C. Thomson, R. A. Ang, B. D. Velie, and N. A. Hamilton. 2018.  
952 Founder-specific inbreeding depression affects racing performance in Thoroughbred  
953 horses. *Scientific Reports* 8:6167.
- 954 Trevarrow, B., and B. Robison. 2004. Genetic backgrounds, standard lines, and husbandry of  
955 zebrafish. *Methods in Cell Biology* 77:599-616.
- 956 Venables, W. N., and B. D. Ripley. 2002, *Modern Applied Statistics with S*. New York,  
957 Springer.
- 958 Via, S., and R. Lande. 1985. Genotype-environment interaction and the evolution of  
959 phenotypic plasticity. *Evolution* 39:502-522.

- 960 Wahl, L. M., and D. Agashe. 2022. Selection bias in mutation accumulation. *Evolution*  
961 76:528-540.
- 962 Walker, J. A., C. K. Ghalambor, O. L. Griset, D. McKenney, and D. N. Reznick. 2005. Do  
963 faster starts increase the probability of evading predators? *Functional Ecology*  
964 19:808-815.
- 965 Walsh, B., and M. Lynch. 2018, *Evolution and Selection of Quantitative Traits*, v. . Oxford,  
966 UK, Oxford University Press.
- 967 Walsh, C. B., and K. McGuigan. 2018. Do slower movers have lower reproductive success  
968 and higher mutation load? *Evolution Letters* 2:590-598.
- 969 Westerfield, M. 2007, *The zebrafish book. A guide for the laboratory use of zebrafish (*Danio*  
970 *rerio*)*. Eugene, Oregon, University of Oregon Press.
- 971 Widrick, J. J., D. E. Gibbs, B. Sanchez, V. A. Gupta, A. Pakula, C. Lawrence, A. H. Beggs et  
972 al. 2018. An open source microcontroller based flume for evaluating swimming  
973 performance of larval, juvenile, and adult zebrafish. *Plos One* 13:e0199712.
- 974 Wienholds, E., F. van Eeden, M. Kusters, J. Mudde, R. H. A. Plasterk, and E. Cuppen. 2003.  
975 Efficient target-selected mutagenesis in zebrafish. *Genome Research* 13:2700-2707.
- 976 Wilson, R. S., T. P. Pavlic, R. Wheatley, A. C. Niehaus, and O. Levy. 2020. Modeling escape  
977 success in terrestrial predator-prey interactions. *Integrative and Comparative Biology*  
978 60:497-508.
- 979 Wood, C. W., and E. D. Brodie. 2015. Environmental effects on the structure of the G-  
980 matrix. *Evolution* 69:2927-2940.
- 981 Xu, J. P. 2004. Genotype-environment interactions of spontaneous mutations for vegetative  
982 fitness in the human pathogenic fungus *Cryptococcus neoformans*. *Genetics*  
983 168:1177-1188.

- 984 Yamahira, K., M. Kawajiri, K. Takeshi, and T. Irie. 2007. Inter- and intrapopulation variation  
985 in thermal reaction norms for growth rate: Evolution of latitudinal compensation in  
986 ectotherms with a genetic constraint. *Evolution* 61:1577-1589.
- 987 Zhang, X. S., and W. G. Hill. 2008. The anomalous effects of biased mutation revisited:  
988 Mean-optimum deviation and apparent directional selection under stabilizing  
989 selection. *Genetics* 179:1135-1141.
- 990
- 991

992 **Table 1 The among-family variance-covariance matrix for Control (A) and Mutant (B)**

993 **treatments.** The REML-MVN confidence intervals are reported below their respective  
 994 estimates (90% CI for the variances on the diagonal, a one-tailed test against zero; 95% for  
 995 covariances on the lower off-diagonal, a two-tailed test against zero). Parameters whose CI  
 996 do not include zero are shown in bold. Estimates are from a model fitting an unconstrained  
 997 among-family variance-covariance matrix. No CI could be estimated where the REML  
 998 estimate was zero.

999

**A. Control**

|      | 16°C                    | 20°C                    | 24°C                     | 28°C                    | 31°C                    | 34°C |
|------|-------------------------|-------------------------|--------------------------|-------------------------|-------------------------|------|
| 16°C | 0                       |                         |                          |                         |                         |      |
| 20°C | 1.382<br>(-3.72, 6.45)  | 0                       |                          |                         |                         |      |
| 24°C | 1.506<br>(-3.46, 6.64)  | 4.611<br>(-2.06, 11.48) | 3.077<br>(-5.82, 11.8)   |                         |                         |      |
| 28°C | 0.293<br>(-3.25, 3.74)  | -2.645<br>(-7.70, 2.38) | -4.649<br>(-9.93, 0.62)  | 0                       |                         |      |
| 31°C | 0.492<br>(-4.19, 5.03)  | -2.639<br>(-8.35, 3.03) | -0.537<br>(-7.32, 6.14)  | -1.597<br>(-6.23, 3.03) | 1.183<br>(-5.64, 7.76)  |      |
| 34°C | -1.168<br>(-5.26, 2.88) | 0.230<br>(-4.98, 5.44)  | -4.109<br>(-10.09, 1.77) | -3.832<br>(-7.99, 0.39) | -4.964<br>(-9.99, 0.03) | 0    |

**B. Mutant**

|      | 16°C                          | 20°C                    | 24°C                           | 28°C                    | 31°C                    | 34°C                    |
|------|-------------------------------|-------------------------|--------------------------------|-------------------------|-------------------------|-------------------------|
| 16°C | 2.551<br>(-0.76, 5.83)        |                         |                                |                         |                         |                         |
| 20°C | 3.102<br>(-1.65, 7.70)        | 6.867<br>(-0.52, 14.47) |                                |                         |                         |                         |
| 24°C | <b>5.966</b><br>(0.14, 11.86) | 8.204<br>(-0.57, 16.96) | <b>11.697</b><br>(0.55, 22.90) |                         |                         |                         |
| 28°C | <b>6.255</b><br>(1.33, 11.23) | 6.452<br>(-0.61, 13.78) | <b>10.175</b><br>(1.53, 18.74) | 5.519<br>(-2.39, 13.29) |                         |                         |
| 31°C | 4.421<br>(-0.33, 9.23)        | 4.532<br>(-2.75, 11.88) | 6.860<br>(-2.19, 15.92)        | 2.076<br>(-5.23, 9.34)  | 4.973<br>(-2.82, 12.64) |                         |
| 34°C | <b>4.577</b><br>(0.12, 8.88)  | 3.371<br>(-2.80, 9.59)  | 6.710<br>(-1.07, 14.20)        | 5.084<br>(-1.56, 11.52) | 3.275<br>(-3.08, 9.66)  | 5.616<br>(-0.23, 11.27) |

1000

**Table 2. Dimensionality of among-family covariance matrices for A) Control and B) Mutant treatments.** The results from fitting a nested series of reduced rank co-variance matrices at the among-family level are reported, where the Factor number corresponds to the number of dimensions modelled. Differences in the log-likelihood ratio between sequential models follows a chi-square distribution, with the degrees of freedom (df) corresponding to the difference in the number of parameters between the models. The Akaike Information Criterion (AIC) is also reported (with the smallest AIC, indicating the best fit model, shown in bold). The eigenvalues of the unconstrained among-family matrix estimated in each treatment (Table 1) are also reported, along with the REML-MVN 90% CI. In the Control treatment, the model constrained to six dimensions did not properly converge.

| Factor            | #<br>Parameters | -2log-<br>likelihood | AIC            | $\chi^2$ | df | <i>P</i> -value | Eigenvector | Eigenvalue | 90% CI        |
|-------------------|-----------------|----------------------|----------------|----------|----|-----------------|-------------|------------|---------------|
| <b>A. Control</b> |                 |                      |                |          |    |                 |             |            |               |
| 0                 | 42              | 12043.4              | <b>12121.4</b> |          |    |                 |             |            |               |
| 1                 | 48              | 12031.9              | 12121.9        | 11.5     | 6  | 0.0740          | 1           | 9.884      | (3.54, 16.33) |
| 2                 | 53              | 12021.5              | 12121.5        | 10.4     | 5  | 0.0647          | 2           | 6.996      | (2.81, 11.16) |
| 3                 | 57              | 12021.3              | 12127.3        | 0.1      | 4  | 0.9979          | 3           | 1.655      | (-2.07, 5.37) |
| 4                 | 60              | 12021.3              | 12133.3        | <0.0     | 3  | 0.9995          | 4           | -0.770     | (-3.72, 2.09) |

|   |    |         |         |      |    |         |   |        |                 |
|---|----|---------|---------|------|----|---------|---|--------|-----------------|
| 5 | 62 | 12021.3 | 12135.3 | <0.0 | 2  | >0.9999 | 5 | -4.175 | (-8.78, 0.54)   |
| 6 | 63 | NA      | NA      | NA   | NA | NA      | 6 | -9.331 | (-18.85, -0.18) |

---

**B. Mutant**

---

|   |    |         |                |      |   |         |   |        |               |
|---|----|---------|----------------|------|---|---------|---|--------|---------------|
| 0 | 42 | 11913.6 | 11997.6        |      |   |         |   |        |               |
| 1 | 48 | 11900.1 | <b>11992.1</b> | 13.5 | 6 | 0.0364  | 1 | 35.201 | (11.57, 58.6) |
| 2 | 53 | 11898.2 | 12000.2        | 2.0  | 5 | 0.8550  | 2 | 3.462  | (-1.20, 8.14) |
| 3 | 57 | 11896.8 | 12004.8        | 1.4  | 4 | 0.8475  | 3 | 3.173  | (-0.69, 7.03) |
| 4 | 60 | 11896.8 | 12012.8        | <0.0 | 3 | 0.9993  | 4 | 0.361  | (-3.29, 4.06) |
| 5 | 62 | 11896.8 | 12016.8        | <0.0 | 2 | >0.9999 | 5 | -0.502 | (-4.94, 4.00) |
| 6 | 63 | 11896.8 | 12014.8        | <0.0 | 1 | 0.9261  | 6 | -4.474 | (-9.52, 0.46) |

---

**Table 3. Major axes of among-family variance in swimming speed.** The eigenvector loadings for the first and second axes of the unconstrained estimate of among-family variance in the Control (i.e.,  $g_{max}$  and  $g_2$ ) and Mutant (i.e.,  $m_{max}$  and  $m_2$ ) treatments are shown. The corresponding eigenvalues are reported in Table 2.

|      | Control   |        | Mutant    |        |
|------|-----------|--------|-----------|--------|
|      | $g_{max}$ | $g_2$  | $m_{max}$ | $m_2$  |
| 16°C | 0.184     | -0.149 | 0.317     | 0.252  |
| 20°C | 0.482     | 0.232  | 0.394     | -0.537 |
| 24°C | 0.737     | -0.130 | 0.591     | -0.064 |
| 28°C | -0.410    | -0.239 | 0.434     | 0.274  |
| 31°C | -0.022    | -0.622 | 0.306     | -0.478 |
| 34°C | -0.147    | 0.681  | 0.336     | 0.584  |

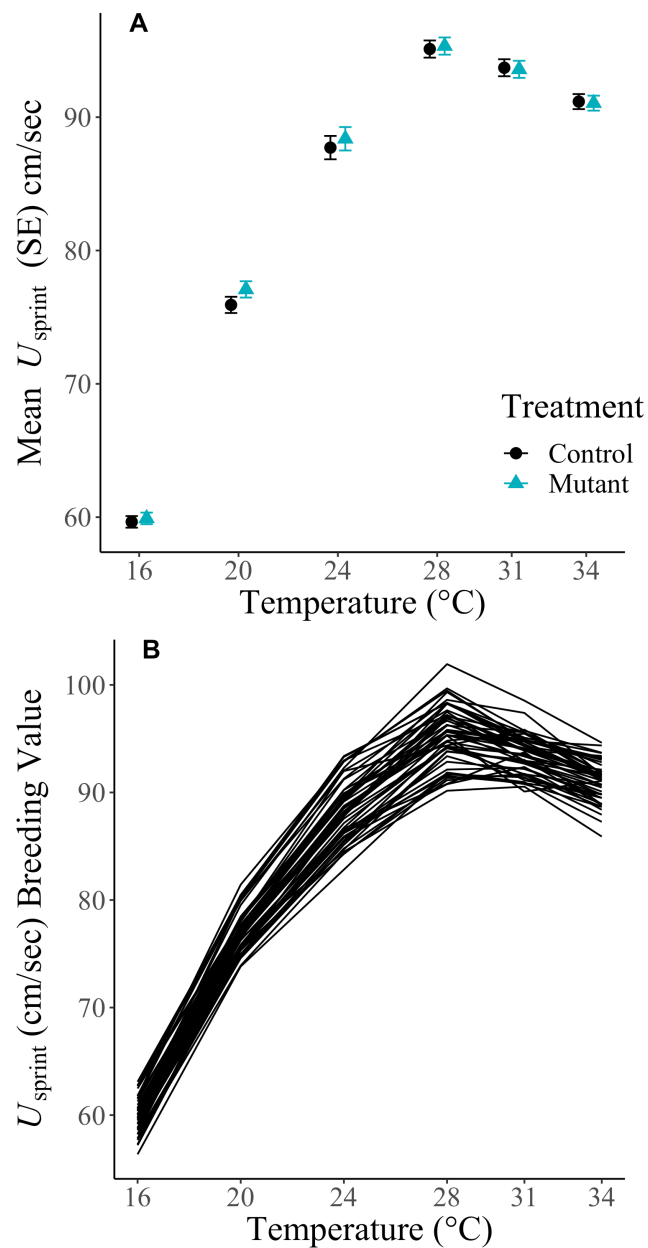

**Figure 1. Variation in swimming speed with temperature.** A) Treatment mean swimming speeds. Plotted are the least squares means ( $\pm$  SE) from model (1) at each of the six temperatures for the Control (black circles) and Mutant (blue triangles) treatments. B) Among Mutant family variation in swimming speed. Plotted are the Best Linear Unbiased Predictors (BLUPs) at each of the six temperatures from model (1) (fit to centred data) for the



Mutant treatment, with lines connecting the point estimates for each family. The Control treatment BLUPs are not presented as they were invariant at most temperatures (Table 1).

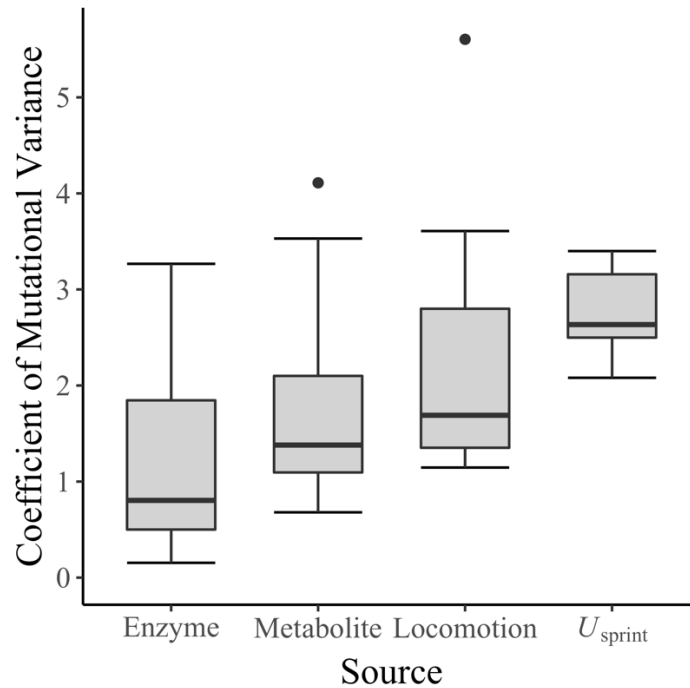

**Figure 2. Comparison of the magnitude of mutational variance.** Estimates of mutational variance were placed on a coefficient of variance scale:  $CV = 100 \times \sqrt{V_M}/\bar{X}$  where  $V_M$  was the mutational variance and  $\bar{X}$  was the trait mean. Plotted are the median (black band), interquartile range (IQR; box) and three times the IQR (whiskers) plus any more extreme observations (circles). The 27 estimates of enzyme activity come from two studies in *Drosophila melanogaster* (Clark et al. 1995; Harada 1995), while the 27 estimates of metabolite pool size come from one study in *Caenorhabditis elegans* (Davies et al. 2016), derived as detailed Table S1 of Conradsen et al. (2022). The 16 locomotion estimates include male and female *D. serrata* activity measured at each of six temperatures (Table 1 of Latimer et al. 2014) as well as turn rate and velocity in *C. elegans* (Ajie et al. 2005; Estes et al. 2005) (derived as described in Table S1 of Conradsen et al. 2022). The six  $U_{sprint}$  estimates from the current study are the difference in among-family variance between Mutant and Control treatments, scaled by the Mutant treatment mean speed at that temperature.
